## 1 **Abstract**

2 The human dorsolateral prefrontal cortex (DLPFC, approximately corresponding to  
3 Brodmann areas 9 and 46) has demonstrable roles in diverse executive functions  
4 such as working memory, cognitive flexibility, planning, inhibition, and abstract  
5 reasoning. However, it remains unclear whether this is the result of one functionally  
6 homogeneous region or whether there are functional subdivisions within the DLPFC.  
7 Here, we divided the DLPFC into seven areas along with rostral-caudal and dorsal-  
8 ventral axes anatomically and explored their respective patterns of structural and  
9 functional connectivity. *In vivo* probabilistic tractography and resting-state functional  
10 magnetic resonance imaging were employed to map out the patterns of connectivity  
11 from each DLPFC subregions. Structural connectivity demonstrated graded intra-  
12 regional connectivity within the DLPFC. The patterns of structural connectivity  
13 between the DLPFC subregions and other cortical areas revealed that the dorsal-  
14 rostral subregions was restricted to connect to other frontal and limbic areas,  
15 whereas the ventral-caudal region was widely connected to frontal, temporal,  
16 parietal, and limbic cortex. Functional connectivity analysis demonstrated that  
17 subregions of DLPFC were strongly interconnected to each other. The dorsal  
18 subregions were associated with the default mode network (DMN), while middle  
19 dorsal-rostral subregions were linked with the multiple demand network (MDN),  
20 respectively. Similar to the results of structural connectivity, the ventral-caudal  
21 subregion showed increased functional coupling with both DMN and MDN. Our  
22 results suggest that DLPFC may be subdivided by the diagonal axis of the dorsal-  
23 ventral axis and rostral-caudal axis, which support the patterns of connectivity the  
24 parts of the DLPFC reflects its integrative executive function.

25

## 26 **Keywords**

27 Dorsolateral prefrontal cortex; tractography, resting-state fMRI, structural  
28 connectivity; functional connectivity; executive control

## 1 Introduction

2 The dorsolateral prefrontal cortex (DLPFC) approximately corresponds to  
3 Brodmann areas (BA) 9 and 46 and consists of the lateral part of superior frontal  
4 gyrus (SFG) and middle frontal gyrus (MFG) (Brodmann, 1908; Walker, 1940;  
5 Petrides and Pandya, 1999). More recently, Petrides (2005b) designated DLPFC as  
6 BA 9, BA 46, and BA 9/46. Previous anatomical and functional studies have  
7 demonstrated differences in the subparts of lateral prefrontal cortex connectivity  
8 including the DLPFC (For the review, see Petrides, 2005b; Thiebaut de Schotten et  
9 al., 2012; Cieslik et al., 2013). Although the DLPFC can be divided into two or three  
10 subregions cytoarchitecturally, the functional role of each subregion is not clear.

11 DLPFC plays an important role in executive functions, such as working  
12 memory, cognitive flexibility, planning, inhibition, and abstract reasoning (Miller and  
13 Cummings, 2007) and is connected to a variety of brain regions including the  
14 thalamus, basal ganglia, hippocampus, and associative cortex such as posterior  
15 temporal, and parietal areas (Petrides and Pandya, 1984; Morris et al., 1999;  
16 Petrides, 2005b; Yeterian et al., 2012). Anatomical studies have demonstrated that  
17 different areas within the DLPFC receive their input from distinct subparts of the  
18 parietal cortex (Petrides and Pandya, 1984; Thiebaut de Schotten et al., 2012) and  
19 that the functional role of the DLPFC may be partly determined by its anatomical  
20 connections to other brain regions (Morecraft et al., 2004; Hoshi, 2006). Strong  
21 evidence from studies with both human and primates suggests an anterior-posterior  
22 axis of functional organization of the lateral prefrontal cortex (Koechlin et al., 2003;  
23 Petrides, 2005b, a; Thiebaut de Schotten et al., 2012). Lesions in the caudal DLPFC  
24 (BA 46 and 9/46) are associated with a deficit on monitoring of information in working  
25 memory whereas the further caudal lesions in BA6 and 8 impair tasks requiring  
26 selection between alternative choices (Petrides, 1985, 2005a). The rostral mid-lateral  
27 prefrontal regions (BA 10 and 46) play a more abstract role in cognitive control  
28 (Petrides, 2005b; Moayed et al., 2015). In addition to the caudal-rostral axis, there is  
29 a dorsal-ventral axis of organization of the mid-lateral prefrontal cortex (DLPFC: BA  
30 46 and 9/46) (Petrides and Pandya, 1999; Petrides, 2005b). In monkey, the dorsal  
31 DLPFC (BA9/46d) plays a role in motor planning, multi-tasking, and maintaining  
32 goals whereas the ventral DLPFC (BA9/46v) is preferentially involved in the  
33 visuospatial information of attended signals and cues. These findings suggest a  
34 possibility that some functionally distinct subparts may exist within the DLPFC.

35 Despite the well-documented role of the DLPFC in various executive  
36 functions, it remains unclear whether functional subdivisions are present within the  
37 DLPFC. Although numerous fMRI studies report DLPFC activation, the exact  
38 location and extent of activation sites vary according to tasks used in those studies  
39 (Nee et al., 2007; Zheng et al., 2008; Rottschy et al., 2012; Bahlmann et al., 2014;  
40 Kohn et al., 2014). One study parcellated the DLPFC using a meta-analysis of task-  
41 dependent and task-independent connectivity (Cieslik et al., 2013). They delineated  
42 the DLPFC into two regions with different connections: the anterior subregion co-

1 activated with the ACC and the posterior subregion co-activated with the parietal  
2 cortex. These findings support functional variation along a rostral-caudal axis in the  
3 DLPFC (Petrides, 2005a). Together, the functional heterogeneity and diversity of  
4 anatomical connections in the human DLPFC suggests it may consist of functionally  
5 distinct subregions.

6 Here, we test whether there are connectivity differences across the rostral-  
7 caudal and dorsal-ventral axes in the DLPFC that would lead to different functional  
8 subregions. We used diffusion weighted imaging (DWI) and resting state fMRI to  
9 explore the structural and functional connectivity across the DLPFC in human  
10 participants. To improve signal in ventromedial frontal and anterior temporal regions,  
11 while maintaining signal across the whole brain, we employed probabilistic  
12 tractography of distortion-corrected DWI (Embleton et al., 2010) and seed-based  
13 analysis of dual-echo resting state fMRI (Halai et al., 2014). The DLPFC was  
14 separated into seven different areas based on the rostral-caudal and dorsal-ventral  
15 divisions of the Brodmann regions (BA9, 46, and 9/46) (Petrides, 2005b). For each  
16 seed region, we investigated and compared the structural connectivity to sixty-three  
17 target regions including left frontal, temporal, parietal, and limbic cortex and the  
18 whole brain functional connectivity. We hypothesized that there would be functional  
19 subregions of the DLPFC determined by their structural or functional connectivity  
20 and that there would be differential patterns of structural and functional connectivity  
21 within the DLPFC along the rostral-caudal or dorsal-ventral axis.

22

## 23 **Materials and Methods**

### 24 *Subjects and data acquisition*

25 Two different datasets were employed in this study. Dataset 1 included 24  
26 healthy, right-handed subjects (11 females; mean age = 25.9, range 19-47), whereas  
27 dataset 2 included 78 healthy right-handed subjects (57 females; means age = 25.2,  
28 range 20-44). Each dataset has been utilized for various investigations: Dataset 1  
29 (Cloutman et al., 2012; Bajada et al., 2016; Bajada et al., 2017; Jung et al., 2017;  
30 Jackson et al., 2020) Dataset 2 (Jackson et al., 2016; Jackson et al., 2018; Jung et  
31 al., 2018; Jackson et al., 2020). Dataset 1 consisted of distortion-corrected DWI and  
32 structural MR imaging. DWI was performed using a pulsed gradient spin echo-planar  
33 sequence, with TE = 59ms, TR  $\approx$  11884ms, G = 62 mTm<sup>-1</sup>, half scan factor = 0.679,  
34 112 x 112 image matrix reconstructed to 128 x 128 using zero padding,  
35 reconstructed resolution 1.875 x 1.875 mm, slice thickness 2.1 mm, 60 contiguous  
36 slices, 61 non-collinear diffusion sensitization directions at b = 1200 smm<sup>-2</sup> ( $\Delta$  = 29.8  
37 ms,  $\delta$  = 13.1 ms), 1 at b = 0, SENSE acceleration factor = 2.5. Acquisitions were  
38 cardiac gated using a peripheral pulse unit positioned over the participants' index  
39 finger or an electrocardiograph. For each gradient direction, two separate volumes  
40 were obtained with opposite polarity k-space traversal with phase encoding in the  
41 left-right/right-left direction to be used in the signal distortion correction procedure  
42 (Embleton et al., 2010). A co-localized T2 weighted turbo spin echo scan, with in-

1 plane resolution of 0.94 x 0.94 mm and slice thickness 2.1 mm, was obtained as a  
2 structural reference scan to provide a qualitative indication of distortion correction  
3 accuracy. A high resolution T1-weighted 3D turbo field echo inversion recovery  
4 image (TR  $\approx$  2000 ms, TE = 3.9 ms, TI = 1150 ms, flip angle 8°, 256 x 205 matrix  
5 reconstructed to 256 x 256, reconstructed resolution 0.938 x 0.938 mm, slice  
6 thickness 0.9 mm, 160 slices, SENSE factor = 2.5) was used.

7 Dataset 2 included resting-state fMRI and structural MR imaging. To cover the  
8 whole brain without signal dropout around the rostral temporal and inferior frontal  
9 cortices, a dual-echo fMRI protocol was performed (Poser et al., 2006; Halai et al.,  
10 2014). This involves parallel acquisition at a short echo (12ms) leading to less signal  
11 loss in areas of high magnetic susceptibility and a standard long echo (35ms) to  
12 maintain high contrast sensitivity throughout the brain. The results from the 2 echoes  
13 were combined using linear summation, previously shown to be optimal. The fMRI  
14 parameters included 42 slices, 80 x 80 matrix, 240 x 240 x 126mm FOV, in-plane  
15 resolution 3 x 3, slice thickness 4mm. 130 volumes were collected over 6.25  
16 minutes. T1-weighted structural images were acquired using a 3D MPRAGE pulse  
17 sequence with 200 slices, in-planed resolution 0.94 x 0.94m slice thickness 1.2mm,  
18 TR = 8.4ms, TE = 3.9ms. During resting-state fMRI, all subjects were instructed to  
19 keep their eyes open and look at the fixation cross. Imaging data were acquired on a  
20 3T Philips Achieva scanner (Philips Medical System, Best Netherlands). The study  
21 was approved by the local ethics committee and all participants provided written  
22 informed consent forms.

23

#### 24 *Definition of seed regions and target masks*

25 In order to divide the DLPFC (BA 9 and BA46) on the rostral-caudal  
26 dimension and to explore differences in DLPFC connectivity, 7 anatomically defined  
27 regions of interest (ROIs) were defined in the left hemisphere (Fig.1A): two located  
28 on BA 9 (anterior: 9a, posterior: 9p), two placed in dorsal-middle frontal gyrus  
29 (anterior: 9/46da, posterior: 9/46dp), one was on BA 46 (46), and two placed in  
30 ventral-middle frontal gyrus (anterior: 9/46va, posterior: 9/46vp). The seeds regions  
31 were identified as a sphere with 6 mm radius in the MNI template brain based on  
32 topographic description and defined carefully without overlapping each other. 63  
33 target regions covering frontal, temporal, parietal, and limbic cortex were defined  
34 using WFU Pick Atlas (Maldjian et al., 2003) and SPM Anatomy toolbox (Eickhoff et  
35 al., 2005). It should be noted that the occipital lobe was not included in this study  
36 because there was no direct white matter pathways connecting the DLPFC and  
37 occipital lobe (Petrides and Pandya, 1984; Morris et al., 1999; Petrides, 2005b;  
38 Yeterian et al., 2012). The frontal lobe regions included BA 10 (frontal pole: FP), BA  
39 44 (pars opercularis), BA 45 (pars triangularis), BA47 (pars orbitalis), medial  
40 orbitofrontal cortex (medOFC), lateral OFC (latOFC), supplementary motor area  
41 (SMA), and primary motor cortex (M1). The parietal lobe had 7 regions in superior  
42 parietal cortex (SPC: 5L, 5M, 5Ci, 7A, 7PC, 7M, 7P), 3 regions in intraparietal sulcus



1 (IPS: IPS1, IPS2, IPS3), and 7 regions in inferior parietal cortex (IPC: PPop, PPt, PF,  
2 PFM, PFcm, PGa, PGp). The temporal lobe had 20 ROIs covering superior temporal  
3 gyrus (STG), middle temporal gyrus (MTG), inferior temporal gyrus (ITG), fusiform  
4 gyrus (FG), parahippocampal gyrus (PhG) (please, see the detailed location of the  
5 temporal ROIs for Jung et al., 2017; Jung et al., 2018). The limbic lobe included  
6 insular, amygdala, hippocampus, caudate, putamen, pallidum, thalamus, and 3  
7 regions of cingulate cortex (anterior cingulate cortex; ACC, middle CC; MCC,  
8 posterior CC; PCC). The DARTEL (diffeomorphic anatomical registration through an  
9 exponentiated lie algebra) toolbox (Ashburner, 2007) was used to transform the  
10 seeds and masks from the MNI space into each individual's native diffusion space.  
11 The transform was estimated using each subject's T1-weighted image coregistered  
12 to their diffusion weighted images. The accuracy of the transformation of ROIs into  
13 native space was inspected using the anatomical images. For resting-state functional  
14 connectivity analysis, ROIs without DARTEL transformations were used as analysis  
15 was performed in MNI space.

16

### 17 *Probabilistic tractography*

18 Unconstrained probabilistic tractography was performed using the PICO  
19 software package (Parker and Alexander, 2005), sampling the orientation of  
20 probability density functions (PDFs) which was generated using constrained  
21 spherical deconvolution (Tournier et al., 2008) and model-based residual  
22 bootstrapping (Haroon et al., 2009; Jeurissen et al., 2011). 20,000 Monte Carlo  
23 streamlines were initiated from each voxel in the DLPFC seed regions. Step size  
24 was set to 0.5 mm. Stopping criteria for the streamlines included terminating if the  
25 pathway curvature over a voxel was greater than  $180^\circ$ , or the streamline reached a  
26 physical path limit of 500 mm. A single whole-brain probabilistic map was generated  
27 for each of the 7 seed ROIs for each participant. Probability maps were masked with  
28 each ROI and the maximum connectivity value (ranging from 0 to 20,000) between  
29 the seeds and each mask was extracted. The resultant connectivity matrices were  
30 subjected to a double threshold to ensure that only connections with high probability  
31 in the majority of participants were considered. For the first-level individual threshold,  
32 following the approach described by Cloutman et al. (2012), the  $\lambda$ -value of the  
33 Poisson distribution identified was used to determine a threshold value at  $p = 0.025$ .  
34 For the second-level group threshold, we used two criteria for consistency (over 75%  
35 of participants, i.e., at least 18/24 participants and over 50% of participants, i.e., at  
36 least 12/24 participants).

37

### 38 *Resting-state fMRI data analysis*

39 Pre-processing was performed using SPM 8 and the data processing  
40 assistant for Resting State fMRI (DPARSF Advanced Edition, V2.3) toolbox. The first  
41 two volumes were discarded to allow for magnetic saturation effects. The images

1 were slice-time corrected, realigned, and coregistered to the individual's structural  
2 image using SPM 8. Censoring was applied using a threshold of greater than 3mm  
3 of translation or 1 degree of rotation, which resulted in the exclusion of 6 participants  
4 from further analysis. Within DPARSF nuisance covariates were regressed out and  
5 the images were normalised using DARTEL, smoothed with an 8mm full-width half  
6 maximum (FWHM) Gaussian kernel. The results were filtered at .01 - .08 Hz.  
7 Nuisance covariates were regressed out including 24 motion parameters calculated  
8 from the 6 original motion parameters using Volterra expansion (Friston et al., 1996),  
9 which was shown to improve motion correction compared to the 6 parameters alone  
10 (Yan et al., 2013; Power et al., 2014). Additional covariates were included for outlier  
11 time points with a with a z-score greater than 2.5 from the mean global power or  
12 more than 1mm translation as identified using the ARTifact detection Tools software  
13 package (ART; [www.nitrc.org/projects/artifact\\_detect](http://www.nitrc.org/projects/artifact_detect)). These were entered as  
14 covariates with white matter, CSF and global tissue signal. Then, linear detrending  
15 was performed. Seed-based functional connectivity analyses were performed using  
16 DPARSF. Functional connectivity maps from the seeds were z-score normalised.  
17 One sample t-tests were used to detect areas with significant connectivity to the  
18 seed regions. The resultant images were thresholded at  $p < 0.001$ , FWE-corrected at  
19 the cluster level. Comparisons between the functional connectivity maps of different  
20 seed regions were conducted using paired t-tests.

21

## 22 **Results**

### 23 *Structural connectivity patterns across the DLPFC*

24 Using probabilistic tractography, the structural connectivity for each DLPFC  
25 seed was identified, see Table 1 and Fig. 1. The full pattern of connectivity across  
26 the brain may be seen in Fig. 2. There was strong intra-DLPFC connectivity on the  
27 dorsal-ventral axis (along the gyri). Additionally, the mid-DLPFC regions (9/46da and  
28 9/46dp) showed the strongest intra-DLPFC connectivity, with connections to more  
29 dorsal and ventral areas (Fig. 1B). Across the DLPFC, there was a high level of  
30 connectivity with limbic regions, especially the insular and basal ganglia (caudate,  
31 putamen, and pallidum) (Fig. 1C). The ventral-caudal seeds (9/46dp, 9/46va, and  
32 9/46vp) showed structural connections with the thalamus. Only 9/46vp had a  
33 connection to hippocampus. However, no direct connection was identified between  
34 any seed regions and the amygdala. Fig. 1D shows the pattern of connectivity  
35 between the DLPFC seed regions and other lateral associative cortices. All DLPFC  
36 seed regions showed strong connectivity with the frontal pole (FP) and inferior frontal  
37 gyrus (IFG: BA44 and BA45) but not the most ventral aspects of the prefrontal  
38 cortex, including pars orbitalis (BA47) and the OFC. Only the ventral-caudal seeds  
39 (9/46va and 9/46vp) had strong evidence of connections to primary and  
40 supplementary motor regions. Additionally, only the 9/46vp seed connects to  
41 somatosensory and dorsal parietal regions (7PC and IPS). It should be noted that  
42 the DLPFC seed regions did not show any connection with the temporal and inferior

1 parietal cortices. Overall, all DLPFC seeds showed strong connectivity with the FP,  
 2 IFG, and the limbic system. The tractography results suggest a single axis of  
 3 changing connectivity from ventral-caudal to dorsal-rostral regions, with the key  
 4 differences being between the most ventral-caudal regions and elsewhere.  
 5 Specifically, the ventral-caudal seeds (9/46va and 9/46vp) show widespread  
 6 structural connectivity to frontal, limbic, sensorimotor, and superior parietal cortex.  
 7

|               |        | 9a         | 9p         | 9/46da     | 9/46dp     | 46         | 9/46va     | 9/46vp     |
|---------------|--------|------------|------------|------------|------------|------------|------------|------------|
| DLPFC         | 9a     | <b>100</b> | <b>88</b>  | 21         | 8          | 8          | 8          | 0          |
|               | 9p     |            | <b>100</b> | <b>67</b>  | <b>58</b>  | 33         | 38         | 0          |
|               | 9/46da |            |            | <b>100</b> | <b>100</b> | <b>100</b> | <b>67</b>  | 4          |
|               | 9/46dp |            |            |            | <b>100</b> | <b>96</b>  | <b>96</b>  | 8          |
|               | 46     |            |            |            |            | <b>100</b> | <b>96</b>  | 13         |
|               | 9/46va |            |            |            |            |            | <b>100</b> | <b>75</b>  |
|               | 9/46vp |            |            |            |            |            |            | <b>100</b> |
| Frontal lobe  | FP     | <b>92</b>  | <b>96</b>  | <b>96</b>  | <b>96</b>  | <b>96</b>  | <b>88</b>  | 25         |
|               | BA44   | 0          | 17         | 4          | 25         | 21         | <b>88</b>  | <b>100</b> |
|               | BA45   | 17         | <b>67</b>  | 17         | <b>63</b>  | <b>75</b>  | <b>96</b>  | <b>92</b>  |
|               | latOFC | 4          | 0          | 0          | 0          | 0          | 0          | 0          |
|               | medOFC | 0          | 0          | 0          | 0          | 0          | 0          | 0          |
|               | BA47   | 17         | 33         | 8          | 25         | 33         | 38         | 46         |
|               | SMA    | 0          | 8          | 0          | 17         | 0          | <b>54</b>  | <b>79</b>  |
|               | M1     | 0          | 4          | 0          | 13         | 4          | <b>79</b>  | <b>96</b>  |
| Temporal lobe | STG    | 0          | 4          | 0          | 0          | 0          | 4          | 4          |
|               | LAT    | 0          | 4          | 0          | 0          | 0          | 4          | 0          |
|               | MED    | 0          | 0          | 0          | 0          | 0          | 0          | 0          |
|               | aSTG   | 0          | 0          | 0          | 0          | 0          | 0          | 4          |
|               | aMTG   | 0          | 0          | 0          | 0          | 0          | 0          | 0          |
|               | aITG   | 0          | 0          | 0          | 0          | 0          | 0          | 0          |
|               | aFG    | 0          | 0          | 0          | 0          | 0          | 0          | 0          |
|               | aPhG   | 0          | 0          | 0          | 0          | 0          | 0          | 0          |
|               | HG     | 0          | 0          | 0          | 0          | 0          | 0          | 0          |



|               |      |   |    |    |    |    |    |           |
|---------------|------|---|----|----|----|----|----|-----------|
|               | mSTG | 0 | 0  | 0  | 0  | 0  | 0  | 4         |
|               | mMTG | 0 | 4  | 0  | 0  | 0  | 0  | 13        |
|               | mITG | 0 | 0  | 0  | 0  | 0  | 0  | 0         |
|               | mFG  | 0 | 0  | 0  | 0  | 0  | 0  | 0         |
|               | mPHG | 0 | 0  | 0  | 0  | 0  | 0  | 0         |
|               | pSTG | 0 | 0  | 0  | 0  | 0  | 4  | 8         |
|               | pMTG | 0 | 0  | 0  | 0  | 0  | 8  | 25        |
|               | pITG | 0 | 0  | 0  | 0  | 0  | 4  | 21        |
|               | pFG  | 0 | 0  | 0  | 0  | 0  | 0  | 0         |
|               | LG1  | 0 | 0  | 0  | 0  | 0  | 0  | 0         |
|               | LG2  | 4 | 4  | 4  | 4  | 4  | 0  | 0         |
| Parietal lobe | S1   | 0 | 0  | 0  | 0  | 0  | 13 | <b>63</b> |
|               | 5Ci  | 0 | 0  | 0  | 0  | 0  | 0  | 4         |
|               | 5M   | 0 | 0  | 0  | 0  | 0  | 0  | 0         |
|               | 5L   | 0 | 0  | 0  | 0  | 0  | 0  | 0         |
|               | 7PC  | 0 | 0  | 0  | 0  | 0  | 0  | <b>50</b> |
|               | 7A   | 0 | 0  | 0  | 0  | 0  | 0  | 4         |
|               | 7P   | 0 | 0  | 0  | 0  | 0  | 0  | 0         |
|               | 7M   | 0 | 0  | 0  | 0  | 0  | 0  | 0         |
|               | IPS1 | 0 | 0  | 0  | 0  | 0  | 0  | <b>50</b> |
|               | IPS2 | 0 | 0  | 0  | 0  | 0  | 0  | <b>50</b> |
|               | IPS3 | 0 | 4  | 4  | 4  | 4  | 4  | 33        |
|               | PFo  | 0 | 0  | 0  | 0  | 0  | 0  | 8         |
|               | PFt  | 0 | 0  | 0  | 0  | 0  | 0  | 17        |
|               | PF   | 0 | 0  | 0  | 0  | 0  | 0  | 25        |
|               | PFm  | 0 | 0  | 0  | 0  | 0  | 0  | 17        |
|               | PFcm | 0 | 0  | 0  | 0  | 4  | 0  | 46        |
|               | PGa  | 0 | 0  | 0  | 0  | 0  | 0  | 25        |
| PGp           | 0    | 0 | 0  | 0  | 0  | 0  | 13 |           |
| Limbic lobe   | ACC  | 4 | 33 | 17 | 33 | 25 | 25 | 0         |
|               | MCC  | 0 | 0  | 0  | 0  | 0  | 4  | 4         |

|             |           |            |           |           |           |            |           |
|-------------|-----------|------------|-----------|-----------|-----------|------------|-----------|
| PCC         | 0         | 4          | 0         | 4         | 0         | 4          | 0         |
| Insular     | <b>92</b> | <b>100</b> | <b>71</b> | <b>96</b> | <b>79</b> | <b>100</b> | <b>92</b> |
| caudate     | <b>75</b> | <b>92</b>  | <b>67</b> | <b>79</b> | <b>79</b> | <b>92</b>  | <b>58</b> |
| putamen     | <b>54</b> | <b>88</b>  | 46        | <b>88</b> | <b>50</b> | <b>92</b>  | <b>88</b> |
| pallidum    | 42        | <b>83</b>  | 38        | <b>67</b> | 42        | <b>88</b>  | <b>88</b> |
| thalamus    | 17        | 46         | 29        | <b>54</b> | 38        | <b>79</b>  | <b>75</b> |
| amygdala    | 0         | 0          | 0         | 0         | 0         | 0          | 0         |
| hippocampus | 13        | 13         | 4         | 4         | 4         | 29         | <b>63</b> |

1 Table 1 Structural connectivity results for each DLPFC region. Bold font indicates  
 2 that the connection probability was over 50% (12/24) for group analysis.

3 FP = frontal pole; BA = Brodmann's areas; medOFC = medial orbitofrontal cortex;  
 4 latOFC= lateral orbitofrontal cortex; SMA=supplementary motor area; M1 = primary  
 5 motor cortex; S1 = primary somatosensory cortex; IPS =intraparietal sulcus; 5Ci, 5M,  
 6 5L = BA 5 (superior parietal cortex); 7PC, 7A, 7P, 7M = BA 7 (superior parietal  
 7 cortex); PFop, PFt, PF, PFcm, PFm = supramarginal gyrus; PGa, PGp = angular  
 8 gyrus; STG = superior temporal gyrus; LAT = lateral temporal pole; MED = medial  
 9 temporal pole; MTG = middle temporal gyrus; ITG = inferior temporal gyrus; FG =  
 10 fusiform gyrus; PhG = parahippocampal gyrus; HG = Heschl's gyrus; LG1 = lingual  
 11 gyrus next to fusiform gyrus; LG2 = medial lingual gyrus; ACC = anterior cingulate  
 12 cortex; MCC= middle cingulate cortex; PCC = posterior cingulate cortex

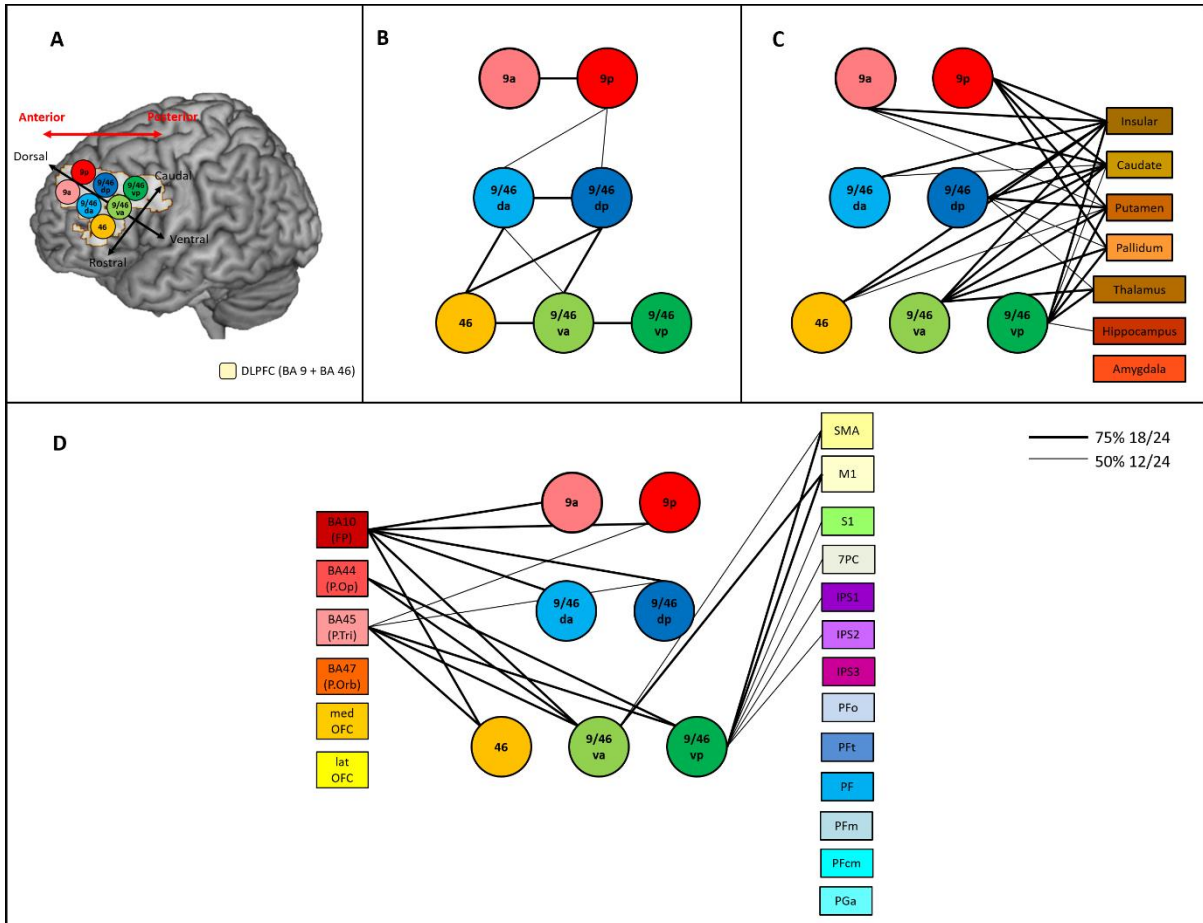

1  
2  
3  
4  
5  
6  
7  
8  
9  
10  
11

Figure 1. (A) The location of the seven DLPFC areas used as seed regions for the connectivity analyses. Red arrow indicate the anterior-posterior axis of the lateral prefrontal cortex. Black arrows represent each axis of the subregions of DLPFC. (B) Intra-DLPFC structural connectivity. (C) The structural connectivity between DLPFC seed regions and the limbic regions. (D) The structural connectivity between DLPFC seed regions and the frontal and parietal regions. Each DLPFC seed is represented by a circle. Lines connecting ROIs are displayed if the probabilistic tractography exceed the minimum probability threshold in either 50% (thin line) or 75% (thick line) of the participants.

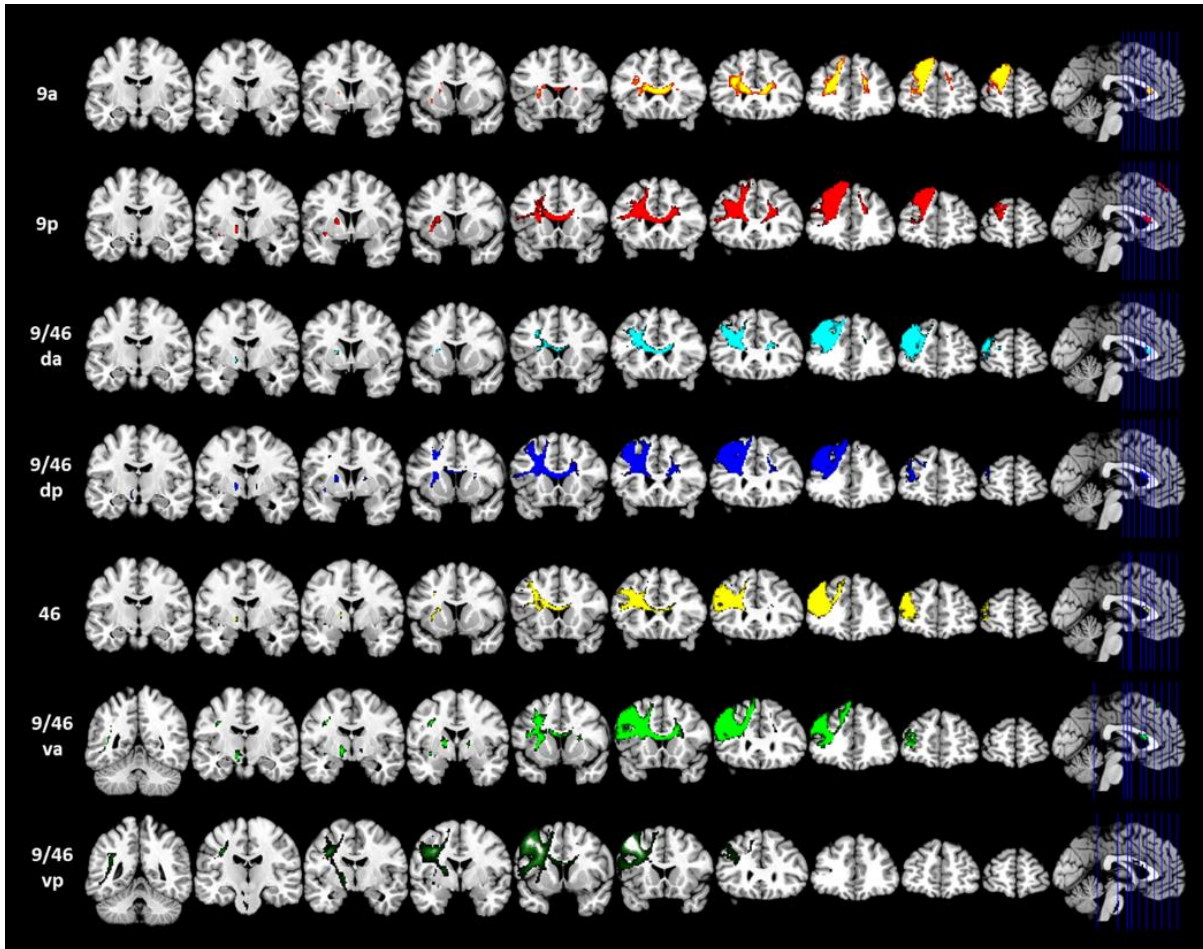

1

2 Figure 2. Structural connectivity patterns of the DLPFC seed regions.

3

#### 4 *Functional connectivity patterns across the DLPFC*

5 The whole-brain resting-state functional connectivity (rsFC) map of each  
6 DLPFC seed region is displayed in Fig. 3. Overall, the 7 ROIs showed involvement in  
7 two distinct networks with graded rsFC patterns suggesting a transition between  
8 these networks. The two BA 9 seeds (9a and 9p) were primarily correlated with the  
9 regions of the default mode network (DMN) including medial prefrontal cortex  
10 (mPFC), OFC, IPC (particularly angular gyrus), precuneus, PCC, anterior/middle  
11 temporal regions, and hippocampus (Raichle et al., 2001; Buckner et al., 2008). All  
12 other seed regions were strongly correlated with brain regions of the multiple  
13 demanding network (MDN) including IFG, SMA, ACC/MCC, SPC, IPS,  
14 supramarginal gyrus, and pMTG (Duncan and Owen, 2000; Seeley et al., 2007;  
15 Woolgar et al., 2011; Spreng et al., 2013). However, area 9/46vp showed  
16 connectivity with both the MDN and the DMN. All DLPFC seed regions were strongly  
17 functionally connected to the insular and basal ganglia regions. The results look to  
18 vary along with dorsal-ventral axis such that the dorsal parts of the DLPFC are  
19 connected with the DMN, whereas the ventral parts of DLPFC are associated with  
20 the MDN. Similar to the structural connectivity results, the most ventral-caudal seed



1 (9/46vp) shows the widespread functional connectivity across both of the DMN and  
2 MDN.  
3

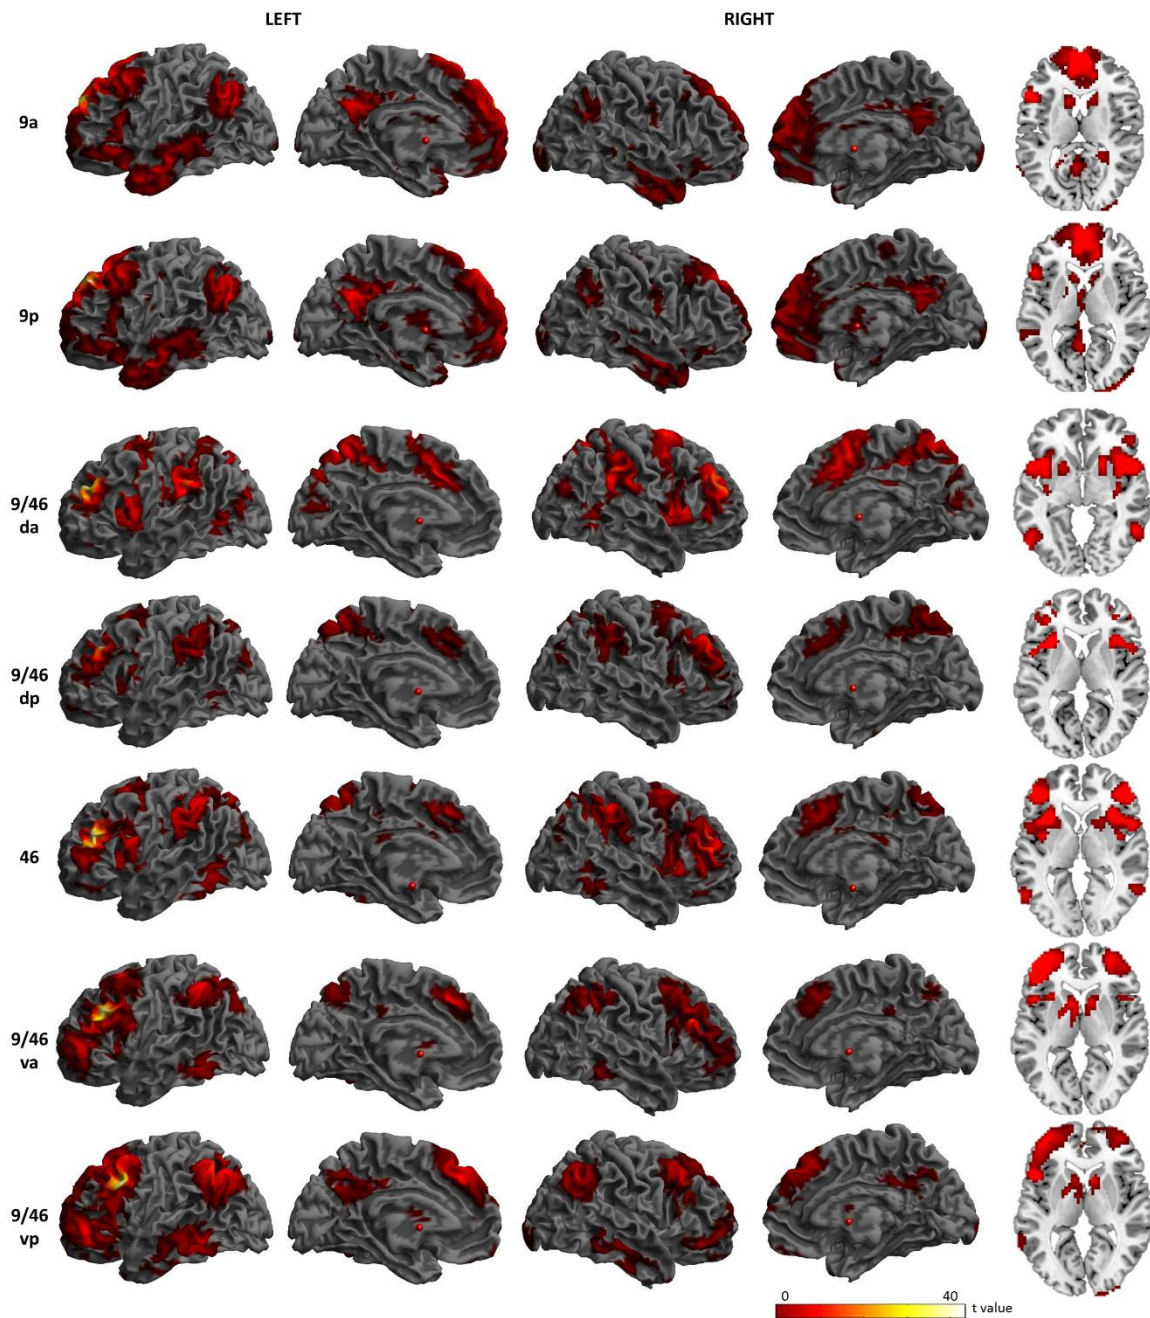

4  
5 Figure 3. Functional connectivity patterns of the DLPFC seed regions.

6  
7 To quantify the differences in rsFC across the DLPFC and visualise the  
8 shifting connectivity across the critical axes, the rsFC maps were compared between  
9 pairs of DLPFC seed regions varying along the rostral-caudal axis. Fig. 4 shows the  
10 result of comparisons within each gyrus, along the rostral-caudal axis. 9a revealed  
11 stronger rsFC with the insula and IPL than 9p, whereas 9p showed higher rsFC with

1 mPFC, angular gyrus, and precuneus than 9a. 9/46da showed higher rsFC with the  
2 IFG, insula, M1/S1, MCC, SPL, IPL, ITG, and visual cortex, yet lower rsFC with IPC,  
3 precuneus, PCC, and lateral temporal cortex than 9/46dp. The comparisons between  
4 the more rostral and caudal ventral seed regions exhibited prominent differences in  
5 similar regions. Relatively rostral regions showed higher rsFC with regions of the  
6 MDN including the IFG, SMA, M1/S1, supramarginal gyrus, ACC/MCC and visual  
7 cortex, yet lower rsFC with DMN regions, such as the mPFC, OFC, angular gyrus,  
8 precuneus, PCC, and lateral temporal cortex, than more caudal regions.

9

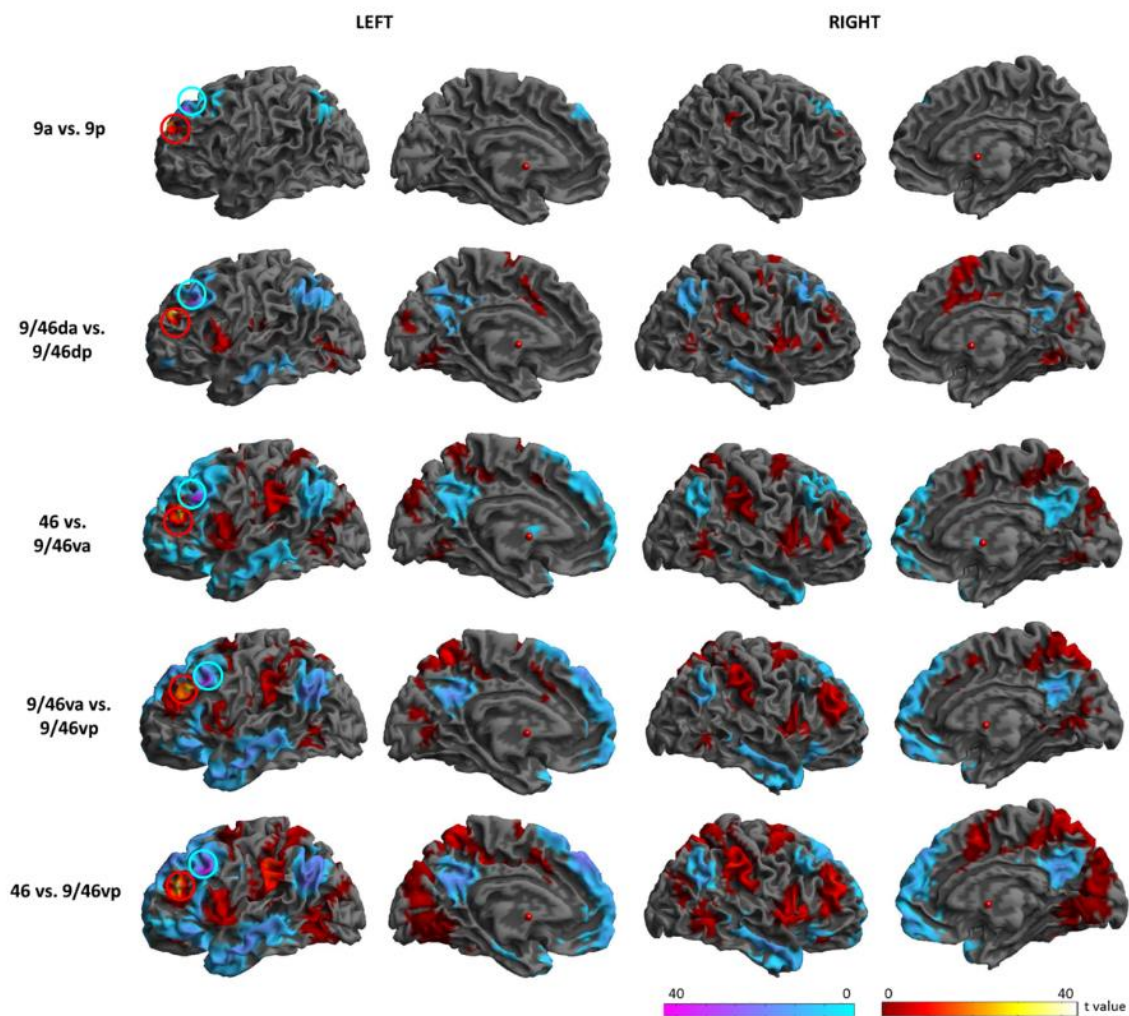

10

11 Figure 4. Comparison of the rsFC along the rostral-caudal axis. Circles indicate the  
12 DLPFC seed regions. Warm colours indicate the comparison from the rostral to the  
13 caudal regions. Cold colours indicate the comparison from the caudal to the rostral  
14 regions.

15

16 In order to compute the differences between seed regions along with dorsal-  
17 ventral axis, we combined the each set of seed regions on the rostral-caudal axis.  
18 Fig. 5 shows the result of comparisons along the dorsal-ventral axis. Dorsal regions



1 (9a and 9p) had significantly higher rsFC with the regions in the DMN and lower  
2 rsFC with the parts of the MDN than the middle regions (9/46da and 9/46dp). The  
3 middle regions showed higher rsFC with the MDN, yet lower rsFC with the DMN than  
4 ventral regions (46, 9/46va, and 9/46vp). The ventral regions had significantly higher  
5 rsFC with the MDN, whereas lower rsFC with the DMN than the dorsal regions.  
6 Overall, the dorsal parts of the DLPFC had strong connectivity with the DMN,  
7 whereas the ventral DLPFC regions were strongly connected with the MDN.

8

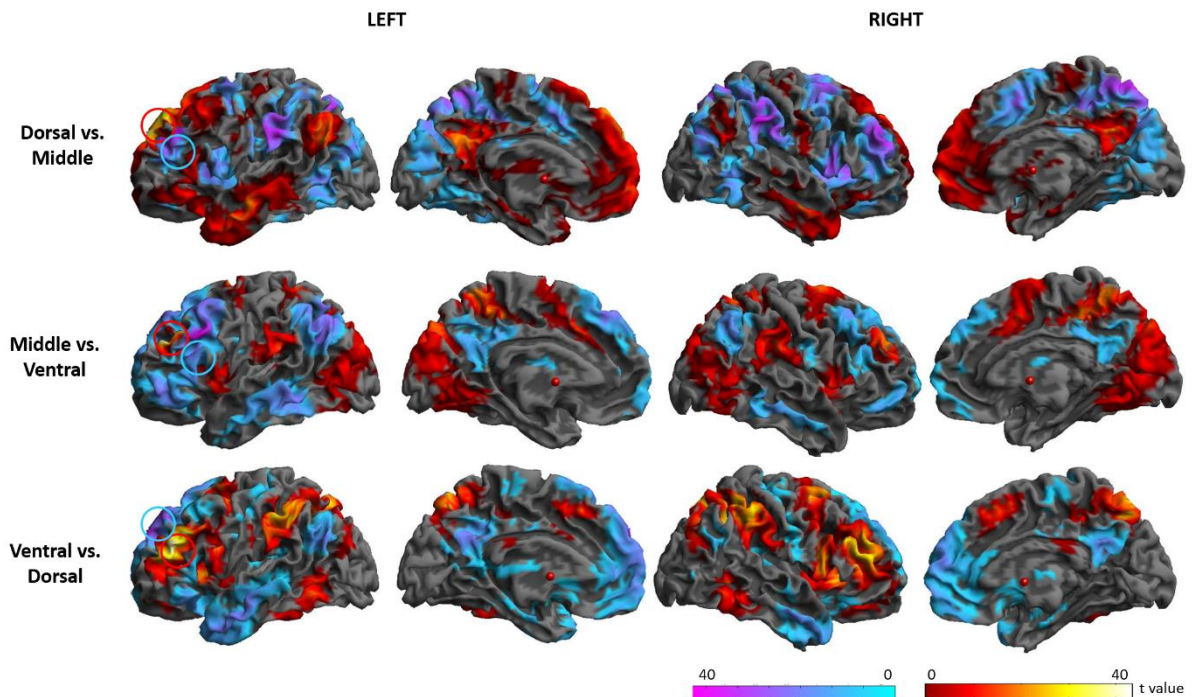

9

10 Figure 5. Comparison of the rsFC along the dorsal-ventral axis. Circles indicate the  
11 location of the DLPFC seed regions.

12

### 13 *Structural and functional connectivity profiles of DLPFC seed regions*

14 The connectivity profile of the DLPFC seed regions is displayed in Fig. 6.  
15 Overall, the seed regions showed more widespread connections to target regions  
16 functionally than structurally (although the structural connectivity of 9/46vp was quite  
17 extensive), with structural connectivity mainly limited to the frontal and limbic cortex.  
18 With a more liberal threshold in structural connectivity (25% of the participants), the  
19 dorsal- caudal seeds (9p and 9/46dp) and the ventral-rostral seed (46) showed a  
20 connection with the ACC and the most ventral-caudal seed (9/46vp) had a  
21 connection to the posterior MTG and angular gyrus (Fig. 3). Functional profiles of the  
22 DLPFC revealed the distinctive connectivity patterns of the BA 9 region was strongly  
23 coupled with the DMN areas and that of the BA 9/46vp was connected to the DMN  
24 as well as MDN. The other regions in middle and ventral DLPFC (BA 9/46da, 9/46dp,  
25 46, and 9/46va) has strong functional connectivity with region in the MDN.

1

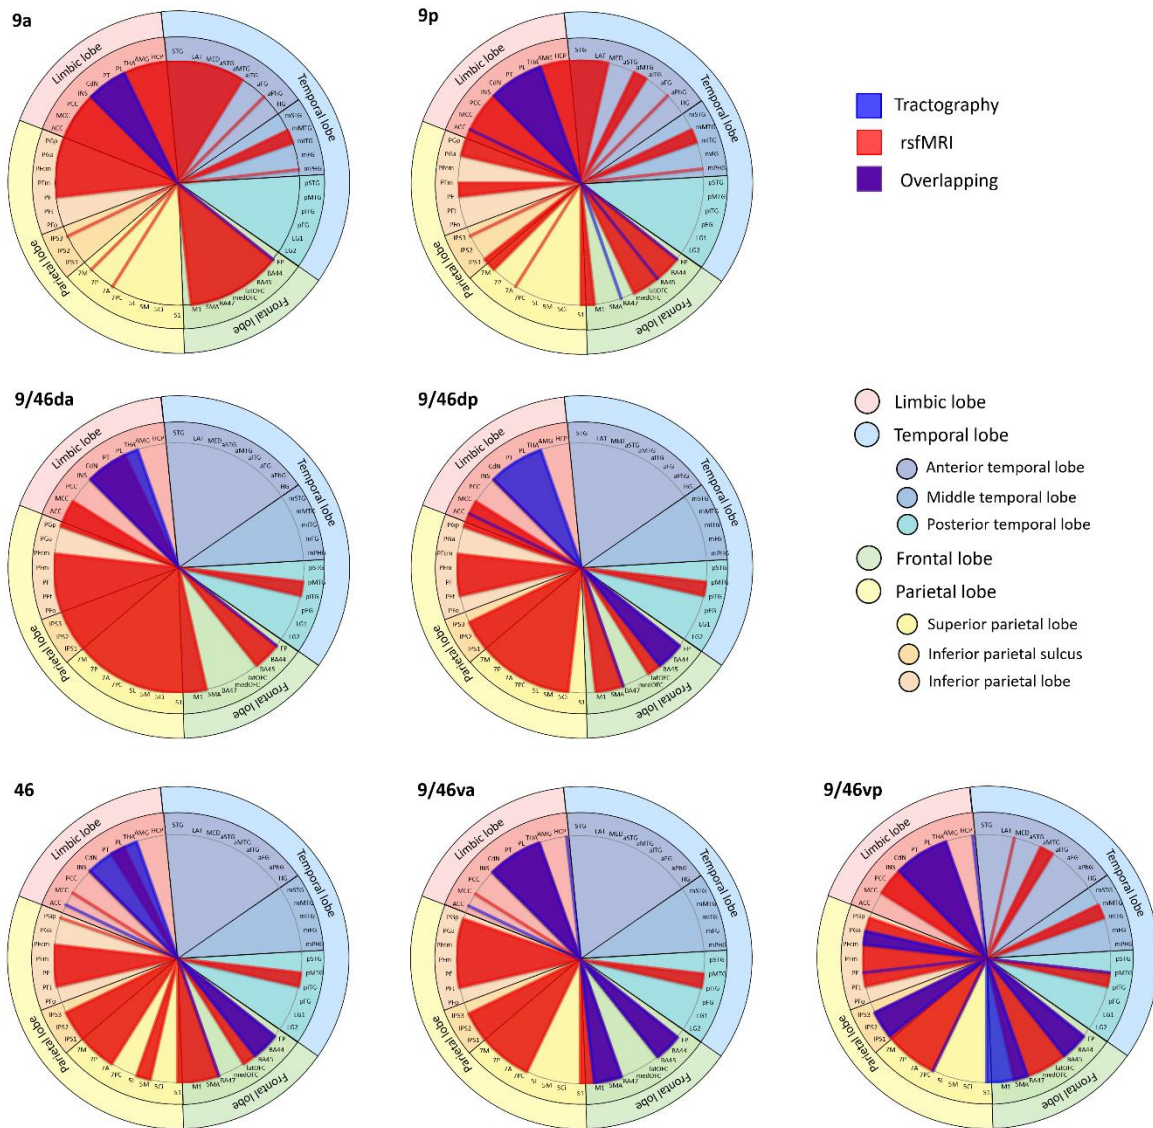

2

3 Figure 6. Summary of the structural (blue) and functional (red) connectivity profiles of  
 4 the DLPFC seed regions. The overlapping areas are coloured in purple. The  
 5 structural connectivity was thresholded at 25% of participants.

6 FP = frontal pole; BA = Brodmann's areas; medOFC = medial orbitofrontal cortex;  
 7 latOFC= lateral orbitofrontal cortex; SMA=supplementary motor area; M1 = primary  
 8 motor cortex; S1 = primary somatosensory cortex; 5Ci, 5M, 5L = BA 5 (superior  
 9 parietal cortex); 7PC, 7A, 7P, 7M = BA 7 (superior parietal cortex); IPS = inferior  
 10 parietal sulcus; PFop, PFt, PF, PFcm, PFM = supramarginal gyrus; PGa, PGp =  
 11 angular gyrus; STG = superior temporal gyrus; LAT = lateral temporal pole; MED =  
 12 medial temporal pole; MTG = middle temporal gyrus; ITG = inferior temporal gyrus;  
 13 FG = fusiform gyrus; PhG = parahippocampal gyrus; HG = Heschl's gyrus; LG1 =  
 14 lingual gyrus next to fusiform gyrus; LG2 = medial lingual gyrus; ACC = anterior  
 15 cingulate cortex; MCC= middle cingulate cortex; PCC = posterior cingulate cortex;

1 INS = insula; CdN = caudate nucleus; PT = putamen; PL = pallidum; THA =  
2 thalamus; AMG = amygdala; HCP = hippocampus

3

#### 4 **Discussion**

5 We investigated the patterns of connectivity in subregions of DLPFC along  
6 with the rostral-caudal and dorsal-ventral axes. We showed that subregions of  
7 DLPFC had differential structural and functional connectivity and distinctive patterns  
8 of DLPFC connectivity may be subdivided the DLPFC into subregions based on their  
9 structural and functional connectivity. Structural connectivity demonstrated graded  
10 intra-regional connectivity within the DLPFC. The patterns of connectivity between  
11 the DLPFC subregions and other cortical areas revealed a separation of dorsal-  
12 rostral subregions from the most ventral-caudal subregion. The dorsal-rostral  
13 subregions was restricted to link other frontal and limbic areas whereas the ventral-  
14 caudal region was widely connected to frontal, temporal, parietal, and limbic cortex.  
15 The patterns of functional connectivity revealed that subregions of DLPFC were  
16 strongly interconnected to each other within the whole frontal cortex and coupled  
17 with two functional brain networks: MDN and DMN. The dorsal subregions were  
18 associated with the DMN, while middle dorsal-rostral subregions were linked with the  
19 MDN, respectively. Similar to the results of structural connectivity, the most ventral-  
20 caudal subregion showed increased functional coupling with both DMN and MDN.  
21 Our results suggest that DLPFC may be subdivided by the diagonal axis of the  
22 dorsal-ventral axis and rostral-caudal axis. Our findings support the framework of a  
23 functional organization along the anterior-posterior axis in the lateral prefrontal cortex  
24 (Petrides and Pandya, 1999; Koechlin et al., 2003).

25 The Cascade model explains the process that executive control is  
26 implemented within the lateral prefrontal cortex along a posterior-to-anterior  
27 hierarchy, from simple to more abstract cognitive control processing (Koechlin et al.,  
28 2003). For example, posterior DLPFC supports action selection based on sensory  
29 input and anterior DLPFC provides episodic control for action selection, taking into  
30 account the ongoing context. The frontopolar cortex supports branching control for  
31 action selection based on a holding temporal context. Our structural connectivity  
32 results supports this progressive posterior to anterior hierarchy within the DLPFC  
33 subregions, showing highly interconnected subregions within each gyri via short U-  
34 fibres as well as DLPFC connections with the FP, IFG and motor regions via short  
35 frontal tracks (Catani et al., 2012; Yeterian et al., 2012). Specifically, the dorsal-  
36 rostral subregions connected to the FP via the frontal aslant tract, while the ventral-  
37 caudal subregions had connection to sensory motor regions through the frontal  
38 longitudinal tracts. Similarly, our functional connectivity results demonstrated that  
39 subregions of DLPFC had strong coupling with other frontal regions including the FP,  
40 IFG, OFC, and motor cortex. These patterns of connectivity within the DLPFC  
41 reflecting local short fibres suggest its graded and integrative organization, support



1 the anterior-posterior gradient across the whole frontal system (Petrides and  
2 Pandya, 1999; Petrides, 2005b).

3 We observed that the dorsal-rostral subregions (anterior parts of the DLPFC)  
4 were linked to the frontopolar regions with increased functional connectivity with the  
5 DMN. As the frontopolar cortex is a supramodal area involved in various higher order  
6 functions such as self-directed thought, rational integration - the simultaneous  
7 consideration of multiple relations, and cognitive branching – holding goals while  
8 exploring secondary goals, planning, and reasoning (Ramnani and Owen, 2004).  
9 With co-activation of the frontopolar cortex, it has reported that the DMN could be  
10 activated for self-generated thought (Christoff et al., 2016) or increased cognitive  
11 reasoning complexity (Sormaz et al., 2018). These studies supports our findings that  
12 dorsal-rostral subregions of the DLPFC connected with the FP were strongly coupled  
13 with the DMN. In line with the anterior-posterior gradient in the prefrontal cortex, our  
14 connectivity analysis suggests that the anterior parts of the DLPFC would be  
15 involved in more challenging cognitive control such as complex cognitive reasoning  
16 and cognitive branching.

17 In contrast, the middle-ventral subregions (middle-posterior parts) were  
18 connected to the IFG (BA 44 and 45) with strong coupling with the MDN and the  
19 ventral-caudal region (the most posterior part) had anatomical connection with  
20 temporal and parietal areas with increased functional connectivity with both DMN  
21 and MDN. Several cortico-cortical association pathways link the prefrontal cortex and  
22 other cortical regions (Petrides and Pandya, 1984; Petrides, 2005b; Catani et al.,  
23 2012; Thiebaut de Schotten et al., 2012; Yeterian et al., 2012). The superior  
24 longitudinal fasciculus (SLF) links the PFC and parietal cortex. SLF has three distinct  
25 branches: SLF I connecting the superior frontal area (BA 8, 9, 32) to SPC, SLF II  
26 connecting the SFG/MFG to IPS/AG, SLF III connecting IFG to IPS. The arcuate  
27 fasciculus (AF) connects the posterior regions of the frontal lobe and temporal lobe  
28 (Parker et al., 2005). The inferior fronto-occipital fasciculus (IFOF) connects occipital  
29 cortex, temporal areas, ventrolateral frontal cortex and inferior parietal regions  
30 (Schmahmann et al., 2007; Martino et al., 2010). As a part of the MDN, the IFG is  
31 involved in cognitive control and language processing (Brass et al., 2005; Camilleri  
32 et al., 2018). As the IPS shows anatomical connection with the DLPFC via SLF I/SLF  
33 II (Petrides and Pandya, 1984; Petrides, 2005a; Thiebaut de Schotten et al., 2012),  
34 the IPS acts as a multifaceted behavioural integrator, binding task-relevant  
35 information from the sensory, motor, and cognitive domains, mediated by the top-  
36 down control of DLPFC (Gottlieb, 2007). These findings suggest that the posterior  
37 parts of the DLPFC would be associated with the core processes of cognitive control,  
38 supporting the anterior-to-posterior functional organization of the DLPFC.

39 In our results, the middle-ventral subregions did not show anatomical  
40 connections with the IPS but they were functionally coupled with the MDN. One  
41 explanation of this discrepancy is that a weak anatomical connection between two  
42 regions may still hold a high functional significance via indirect connections of shared

1 brain regions (Friston, 2002; Damoiseaux and Greicius, 2009). Functional  
2 connectivity does not necessarily require direct, physical connections and several  
3 studies have reported functional connections between regions without anatomical  
4 connectivity (Damoiseaux and Greicius, 2009). Therefore, the functional connectivity  
5 without physical connections potentially results from indirect anatomical connections  
6 via shared brain areas.

7 The DLPFC is functionally and structurally connected with subcortical areas  
8 including the insular and ACC (Catani et al., 2012; Cieslik et al., 2013). As core  
9 areas of the MDN, insular and ACC play a role in cognitively demanding tasks,  
10 responding to uncertainty and emotional salience (Seeley et al., 2007; Menon and  
11 Uddin, 2010; Camilleri et al., 2018). A meta-analysis study demonstrated strong  
12 functional connectivity between DLPFC and insular/ACC (Cieslik et al., 2013). We  
13 also showed significant functional connectivity between insular/ACC and the DLPFC.  
14 However, our tractography showed structural connections between the DLPFC and  
15 insular only, not the ACC. With a lower threshold, we found some evidence of a  
16 connection between the DLPFC regions and ACC (25% of participants). In addition,  
17 we showed that the corticostriatum projections directly link all DLPFC subregions to  
18 the basal ganglia and thalamus (Alexander et al., 1986; Jarbo and Verstynen, 2015).  
19 In particular, the anatomical connections between the basal ganglia and DLPFC form  
20 a neural circuit involved in several aspects of goal directed behaviours (for a review,  
21 see Haber, 2003), which supports a role for the DLPFC in action control (Petrides,  
22 2005b; Cieslik et al., 2013). Furthermore, the extensive connections from the basal  
23 ganglia to the cerebral cortex potentially account for the discrepancy between the  
24 structural and functional connectivity in the DLPFC subregions.

25 In the current study, we explored the structural and functional connectivity  
26 across the subregions of DLPFC using probabilistic tractography and rsfMRI  
27 approaches. The key limitations of the probabilistic tractography are the issues of  
28 distance effect and thresholding (Jones, 2008; Morris et al., 2008). A degree of  
29 uncertainty in fibre orientation exists at each step in the propagation of a pathway.  
30 This accumulation of uncertainty from voxel to voxel as the streamline is advanced  
31 causes a decrease in probability with increasing path length and a progressive  
32 dispersion of the streamlines with distance from the seed (Morris et al., 2008).  
33 Therefore, it is difficult to determine a threshold value which will identify true  
34 positives while simultaneously minimising the rate of both Type I errors in regions  
35 close to the seed and Type II errors in distant regions. Although our procedure most  
36 likely produced a conservative cut-off value for longer pathways (Binney et al., 2012;  
37 Cloutman et al., 2012), there may be long-range connections left undetected.

38

### 39 **Author contribution**

40 J.J: Conceptualization, Methodology, Formal analysis, Investigation, Data curation,  
41 Writing - original draft, Writing - review & editing, Visualization.

- 1 M.A.L.R: Methodology, Investigation, Writing - review & editing.
- 2 R.L.J: Methodology, Writing - original draft, Writing - review & editing.



## 1 **References**

- 2 Alexander GE, DeLong MR, Strick PL (1986) Parallel organization of functionally segregated circuits  
3 linking basal ganglia and cortex. *Annu Rev Neurosci* 9:357-381.
- 4 Ashburner J (2007) A fast diffeomorphic image registration algorithm. *Neuroimage* 38:95-113.
- 5 Bahlmann J, Blumenfeld RS, D'Esposito M (2014) The Rostro-Caudal Axis of Frontal Cortex Is  
6 Sensitive to the Domain of Stimulus Information. *Cereb Cortex*.
- 7 Bajada CJ, Haroon HA, Azadbakht H, Parker GJ, Lambon Ralph MA, Cloutman LL (2016) The tract  
8 terminations in the temporal lobe: Their location and associated functions. *Cortex*.
- 9 Bajada CJ, Jackson RL, Haroon HA, Azadbakht H, Parker GJM, Lambon Ralph MA, Cloutman LL (2017)  
10 A graded tractographic parcellation of the temporal lobe. *Neuroimage* 155:503-512.
- 11 Binney RJ, Parker GJ, Lambon Ralph MA (2012) Convergent connectivity and graded specialization in  
12 the rostral human temporal lobe as revealed by diffusion-weighted imaging probabilistic  
13 tractography. *J Cogn Neurosci* 24:1998-2014.
- 14 Brass M, Derrfuss J, Forstmann B, von Cramon DY (2005) The role of the inferior frontal junction area  
15 in cognitive control. *Trends Cogn Sci* 9:314-316.
- 16 Brodmann K (1908) Contributions to the histological localisation of the cerebral cortex VI  
17 Announcement The arrangement of the cortex in humans. *J Psychol Neurol* 10:229-244.
- 18 Buckner RL, Andrews-Hanna JR, Schacter DL (2008) The brain's default network - Anatomy, function,  
19 and relevance to disease. *Ann Ny Acad Sci* 1124:1-38.
- 20 Camilleri JA, Muller VI, Fox P, Laird AR, Hoffstaedter F, Kalenscher T, Eickhoff SB (2018) Definition  
21 and characterization of an extended multiple-demand network. *Neuroimage* 165:138-147.
- 22 Catani M, Dell'Acqua F, Vergani F, Malik F, Hodge H, Roy P, Valabregue R, Thiebaut de Schotten M  
23 (2012) Short frontal lobe connections of the human brain. *Cortex* 48:273-291.
- 24 Christoff K, Irving ZC, Fox KC, Spreng RN, Andrews-Hanna JR (2016) Mind-wandering as spontaneous  
25 thought: a dynamic framework. *Nat Rev Neurosci* 17:718-731.
- 26 Cieslik EC, Zilles K, Caspers S, Roski C, Kellermann TS, Jakobs O, Langner R, Laird AR, Fox PT, Eickhoff  
27 SB (2013) Is There One DLPFC in Cognitive Action Control? Evidence for Heterogeneity From  
28 Co-Activation-Based Parcellation. *Cerebral Cortex* 23:2677-2689.
- 29 Cloutman LL, Binney RJ, Drakesmith M, Parker GJ, Lambon Ralph MA (2012) The variation of function  
30 across the human insula mirrors its patterns of structural connectivity: evidence from in vivo  
31 probabilistic tractography. *Neuroimage* 59:3514-3521.
- 32 Damoiseaux JS, Greicius MD (2009) Greater than the sum of its parts: a review of studies combining  
33 structural connectivity and resting-state functional connectivity. *Brain Struct Funct* 213:525-  
34 533.
- 35 Duncan J, Owen AM (2000) Common regions of the human frontal lobe recruited by diverse  
36 cognitive demands. *Trends Neurosci* 23:475-483.
- 37 Eickhoff SB, Stephan KE, Mohlberg H, Grefkes C, Fink GR, Amunts K, Zilles K (2005) A new SPM  
38 toolbox for combining probabilistic cytoarchitectonic maps and functional imaging data.  
39 *Neuroimage* 25:1325-1335.
- 40 Embleton KV, Haroon HA, Morris DM, Ralph MA, Parker GJ (2010) Distortion correction for diffusion-  
41 weighted MRI tractography and fMRI in the temporal lobes. *Hum Brain Mapp* 31:1570-1587.
- 42 Friston K (2002) Functional integration and inference in the brain. *Prog Neurobiol* 68:113-143.
- 43 Friston KJ, Williams S, Howard R, Frackowiak RS, Turner R (1996) Movement-related effects in fMRI  
44 time-series. *Magn Reson Med* 35:346-355.
- 45 Gottlieb J (2007) From thought to action: the parietal cortex as a bridge between perception, action,  
46 and cognition. *Neuron* 53:9-16.
- 47 Haber SN (2003) The primate basal ganglia: parallel and integrative networks. *J Chem Neuroanat*  
48 26:317-330.
- 49 Halai AD, Welbourne SR, Embleton K, Parkes LM (2014) A comparison of dual gradient-echo and  
50 spin-echo fMRI of the inferior temporal lobe. *Hum Brain Mapp* 35:4118-4128.

- 1 Haroon HA, Morris DM, Embleton KV, Alexander DC, Parker GJ (2009) Using the model-based  
2 residual bootstrap to quantify uncertainty in fiber orientations from Q-ball analysis. *IEEE*  
3 *Trans Med Imaging* 28:535-550.
- 4 Hoshi E (2006) Functional specialization within the dorsolateral prefrontal cortex: a review of  
5 anatomical and physiological studies of non-human primates. *Neurosci Res* 54:73-84.
- 6 Jackson RL, Hoffman P, Pobric G, Lambon Ralph MA (2016) The Semantic Network at Work and Rest:  
7 Differential Connectivity of Anterior Temporal Lobe Subregions. *J Neurosci* 36:1490-1501.
- 8 Jackson RL, Bajada CJ, Lambon Ralph MA, Cloutman LL (2020) The Graded Change in Connectivity  
9 across the Ventromedial Prefrontal Cortex Reveals Distinct Subregions. *Cereb Cortex* 30:165-  
10 180.
- 11 Jackson RL, Bajada CJ, Rice GE, Cloutman LL, Lambon Ralph MA (2018) An emergent functional  
12 parcellation of the temporal cortex. *Neuroimage* 170:385-399.
- 13 Jarbo K, Verstynen TD (2015) Converging structural and functional connectivity of orbitofrontal,  
14 dorsolateral prefrontal, and posterior parietal cortex in the human striatum. *J Neurosci*  
15 35:3865-3878.
- 16 Jeurissen B, Leemans A, Jones DK, Tournier JD, Sijbers J (2011) Probabilistic fiber tracking using the  
17 residual bootstrap with constrained spherical deconvolution. *Hum Brain Mapp* 32:461-479.
- 18 Jones DK (2008) Studying connections in the living human brain with diffusion MRI. *Cortex* 44:936-  
19 952.
- 20 Jung J, Cloutman LL, Binney RJ, Lambon Ralph MA (2017) The structural connectivity of higher order  
21 association cortices reflects human functional brain networks. *Cortex* 97:221-239.
- 22 Jung J, Visser M, Binney RJ, Lambon Ralph MA (2018) Establishing the cognitive signature of human  
23 brain networks derived from structural and functional connectivity. *Brain Struct Funct*  
24 223:4023-4038.
- 25 Koechlin E, Ody C, Kouneiher F (2003) The architecture of cognitive control in the human prefrontal  
26 cortex. *Science* 302:1181-1185.
- 27 Kohn N, Eickhoff SB, Scheller M, Laird AR, Fox PT, Habel U (2014) Neural network of cognitive  
28 emotion regulation--an ALE meta-analysis and MACM analysis. *Neuroimage* 87:345-355.
- 29 Maldjian JA, Laurienti PJ, Kraft RA, Burdette JH (2003) An automated method for neuroanatomic and  
30 cytoarchitectonic atlas-based interrogation of fMRI data sets. *Neuroimage* 19:1233-1239.
- 31 Martino J, Brogna C, Robles SG, Vergani F, Duffau H (2010) Anatomic dissection of the inferior  
32 fronto-occipital fasciculus revisited in the lights of brain stimulation data. *Cortex* 46:691-699.
- 33 Menon V, Uddin LQ (2010) Saliency, switching, attention and control: a network model of insula  
34 function. *Brain Struct Funct* 214:655-667.
- 35 Miller BL, Cummings JL (2007) *The human frontal lobes : functions and disorders*, 2nd Edition. New  
36 York: Guilford Press.
- 37 Moayeddi M, Salomons TV, Dunlop KA, Downar J, Davis KD (2015) Connectivity-based parcellation of  
38 the human frontal polar cortex. *Brain Struct Funct* 220:2603-2616.
- 39 Morecraft RJ, Cipolloni PB, Stilwell-Morecraft KS, Gedney MT, Pandya DN (2004) Cytoarchitecture  
40 and cortical connections of the posterior cingulate and adjacent somatosensory fields in the  
41 rhesus monkey. *J Comp Neurol* 469:37-69.
- 42 Morris DM, Embleton KV, Parker GJ (2008) Probabilistic fibre tracking: differentiation of connections  
43 from chance events. *Neuroimage* 42:1329-1339.
- 44 Morris R, Pandya DN, Petrides M (1999) Fiber system linking the mid-dorsolateral frontal cortex with  
45 the retrosplenial/presubicular region in the rhesus monkey. *J Comp Neurol* 407:183-192.
- 46 Nee DE, Wager TD, Jonides J (2007) Interference resolution: insights from a meta-analysis of  
47 neuroimaging tasks. *Cogn Affect Behav Neurosci* 7:1-17.
- 48 Parker GJ, Alexander DC (2005) Probabilistic anatomical connectivity derived from the microscopic  
49 persistent angular structure of cerebral tissue. *Philos Trans R Soc Lond B Biol Sci* 360:893-  
50 902.

- 1 Parker GJ, Luzzi S, Alexander DC, Wheeler-Kingshott CA, Ciccarelli O, Lambon Ralph MA (2005)  
2 Lateralization of ventral and dorsal auditory-language pathways in the human brain.  
3 *Neuroimage* 24:656-666.
- 4 Petrides M (1985) Deficits in non-spatial conditional associative learning after periarculate lesions in  
5 the monkey. *Behav Brain Res* 16:95-101.
- 6 Petrides M (2005a) The rostral–caudal axis of cognitive control within the lateral frontal cortex. In  
7 From monkey brain to human brain. Cambridge: MA: MIT Press.
- 8 Petrides M (2005b) Lateral prefrontal cortex: architectonic and functional organization. *Philos T R*  
9 *Soc B* 360:781-795.
- 10 Petrides M, Pandya DN (1984) Projections to the frontal cortex from the posterior parietal region in  
11 the rhesus monkey. *J Comp Neurol* 228:105-116.
- 12 Petrides M, Pandya DN (1999) Dorsolateral prefrontal cortex: comparative cytoarchitectonic analysis  
13 in the human and the macaque brain and corticocortical connection patterns. *Eur J Neurosci*  
14 11:1011-1036.
- 15 Poser BA, Versluis MJ, Hoogduin JM, Norris DG (2006) BOLD contrast sensitivity enhancement and  
16 artifact reduction with multiecho EPI: parallel-acquired inhomogeneity-desensitized fMRI.  
17 *Magn Reson Med* 55:1227-1235.
- 18 Raichle ME, MacLeod AM, Snyder AZ, Powers WJ, Gusnard DA, Shulman GL (2001) A default mode of  
19 brain function. *Proc Natl Acad Sci U S A* 98:676-682.
- 20 Ramnani N, Owen AM (2004) Anterior prefrontal cortex: insights into function from anatomy and  
21 neuroimaging. *Nat Rev Neurosci* 5:184-194.
- 22 Rottschy C, Langner R, Dogan I, Reetz K, Laird AR, Schulz JB, Fox PT, Eickhoff SB (2012) Modelling  
23 neural correlates of working memory: a coordinate-based meta-analysis. *Neuroimage*  
24 60:830-846.
- 25 Schmahmann JD, Pandya DN, Wang R, Dai G, D'Arceuil HE, de Crespigny AJ, Wedeen VJ (2007)  
26 Association fibre pathways of the brain: parallel observations from diffusion spectrum  
27 imaging and autoradiography. *Brain* 130:630-653.
- 28 Seeley WW, Menon V, Schatzberg AF, Keller J, Glover GH, Kenna H, Reiss AL, Greicius MD (2007)  
29 Dissociable intrinsic connectivity networks for salience processing and executive control. *J*  
30 *Neurosci* 27:2349-2356.
- 31 Sormaz M, Murphy C, Wang HT, Hymers M, Karapanagiotidis T, Poerio G, Margulies DS, Jefferies E,  
32 Smallwood J (2018) Default mode network can support the level of detail in experience  
33 during active task states. *Proc Natl Acad Sci U S A* 115:9318-9323.
- 34 Spreng RN, Sepulcre J, Turner GR, Stevens WD, Schacter DL (2013) Intrinsic Architecture Underlying  
35 the Relations among the Default, Dorsal Attention, and Frontoparietal Control Networks of  
36 the Human Brain. *J Cognitive Neurosci* 25:74-86.
- 37 Thiebaut de Schotten M, Dell'Acqua F, Valabregue R, Catani M (2012) Monkey to human  
38 comparative anatomy of the frontal lobe association tracts. *Cortex* 48:82-96.
- 39 Tournier JD, Yeh CH, Calamante F, Cho KH, Connelly A, Lin CP (2008) Resolving crossing fibres using  
40 constrained spherical deconvolution: validation using diffusion-weighted imaging phantom  
41 data. *Neuroimage* 42:617-625.
- 42 Walker AE (1940) A cytoarchitectural study of the prefrontal area of the macaque monkey. *Journal*  
43 *of Comparative Neurology* 73:59-86.
- 44 Woolgar A, Hampshire A, Thompson R, Duncan J (2011) Adaptive coding of task-relevant information  
45 in human frontoparietal cortex. *J Neurosci* 31:14592-14599.
- 46 Yeterian EH, Pandya DN, Tomaiuolo F, Petrides M (2012) The cortical connectivity of the prefrontal  
47 cortex in the monkey brain. *Cortex* 48:58-81.
- 48 Zheng D, Oka T, Bokura H, Yamaguchi S (2008) The key locus of common response inhibition network  
49 for no-go and stop signals. *J Cogn Neurosci* 20:1434-1442.

50
